# Supplementary material for: RNA:DNA hybrids are a novel molecular pattern sensed by TLR9
Source: PubMed Central journal article supplement (PMC3989650; doi:10.1002/embj.201386117), 2014-02-21
Supplement: embj0033-0542-sd3.pdf [file embj0033-0542-sd3.pdf]

# Figure S2

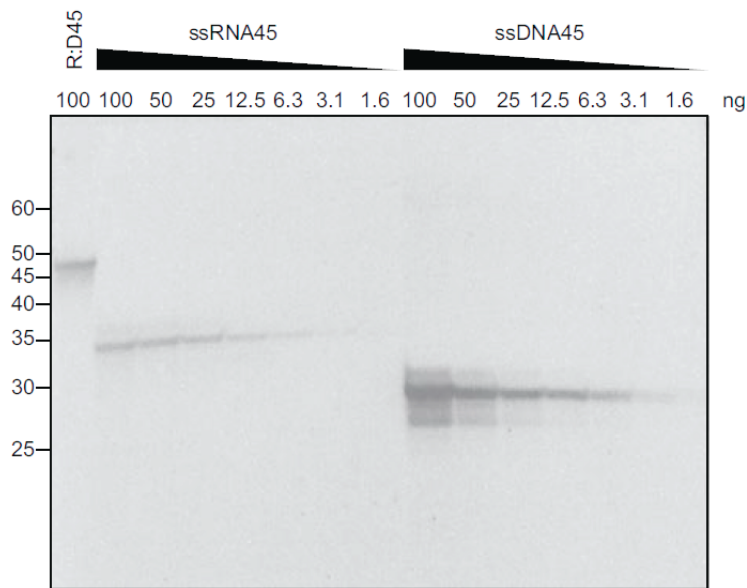

***Figure S2. Native PAGE analysis of the R:D45 hybrid***

Native PAGE analysis of a 45 bp RNA:DNA hybrid representing sequence from the HIV-1 gag gene (R:D45). 100 ng R:D45 was electrophoresed on a 15% native polyacrylamide gel with decreasing amounts of the constituent single-stranded oligonucleotides ssRNA45 and ssDNA45 to establish that a pure 45bp hybrid was formed. 200 ng of 5bp ladder (M) was included as a size control. Nucleic acids visualised with Sybr Gold.
