# Supplementary material for: RNA:DNA hybrids are a novel molecular pattern sensed by TLR9
Source: PubMed Central journal article supplement (PMC3989650; doi:10.1002/embj.201386117), 2014-02-21
Supplement: embj0033-0542-sd4.pdf [file embj0033-0542-sd4.pdf]

Figure S3

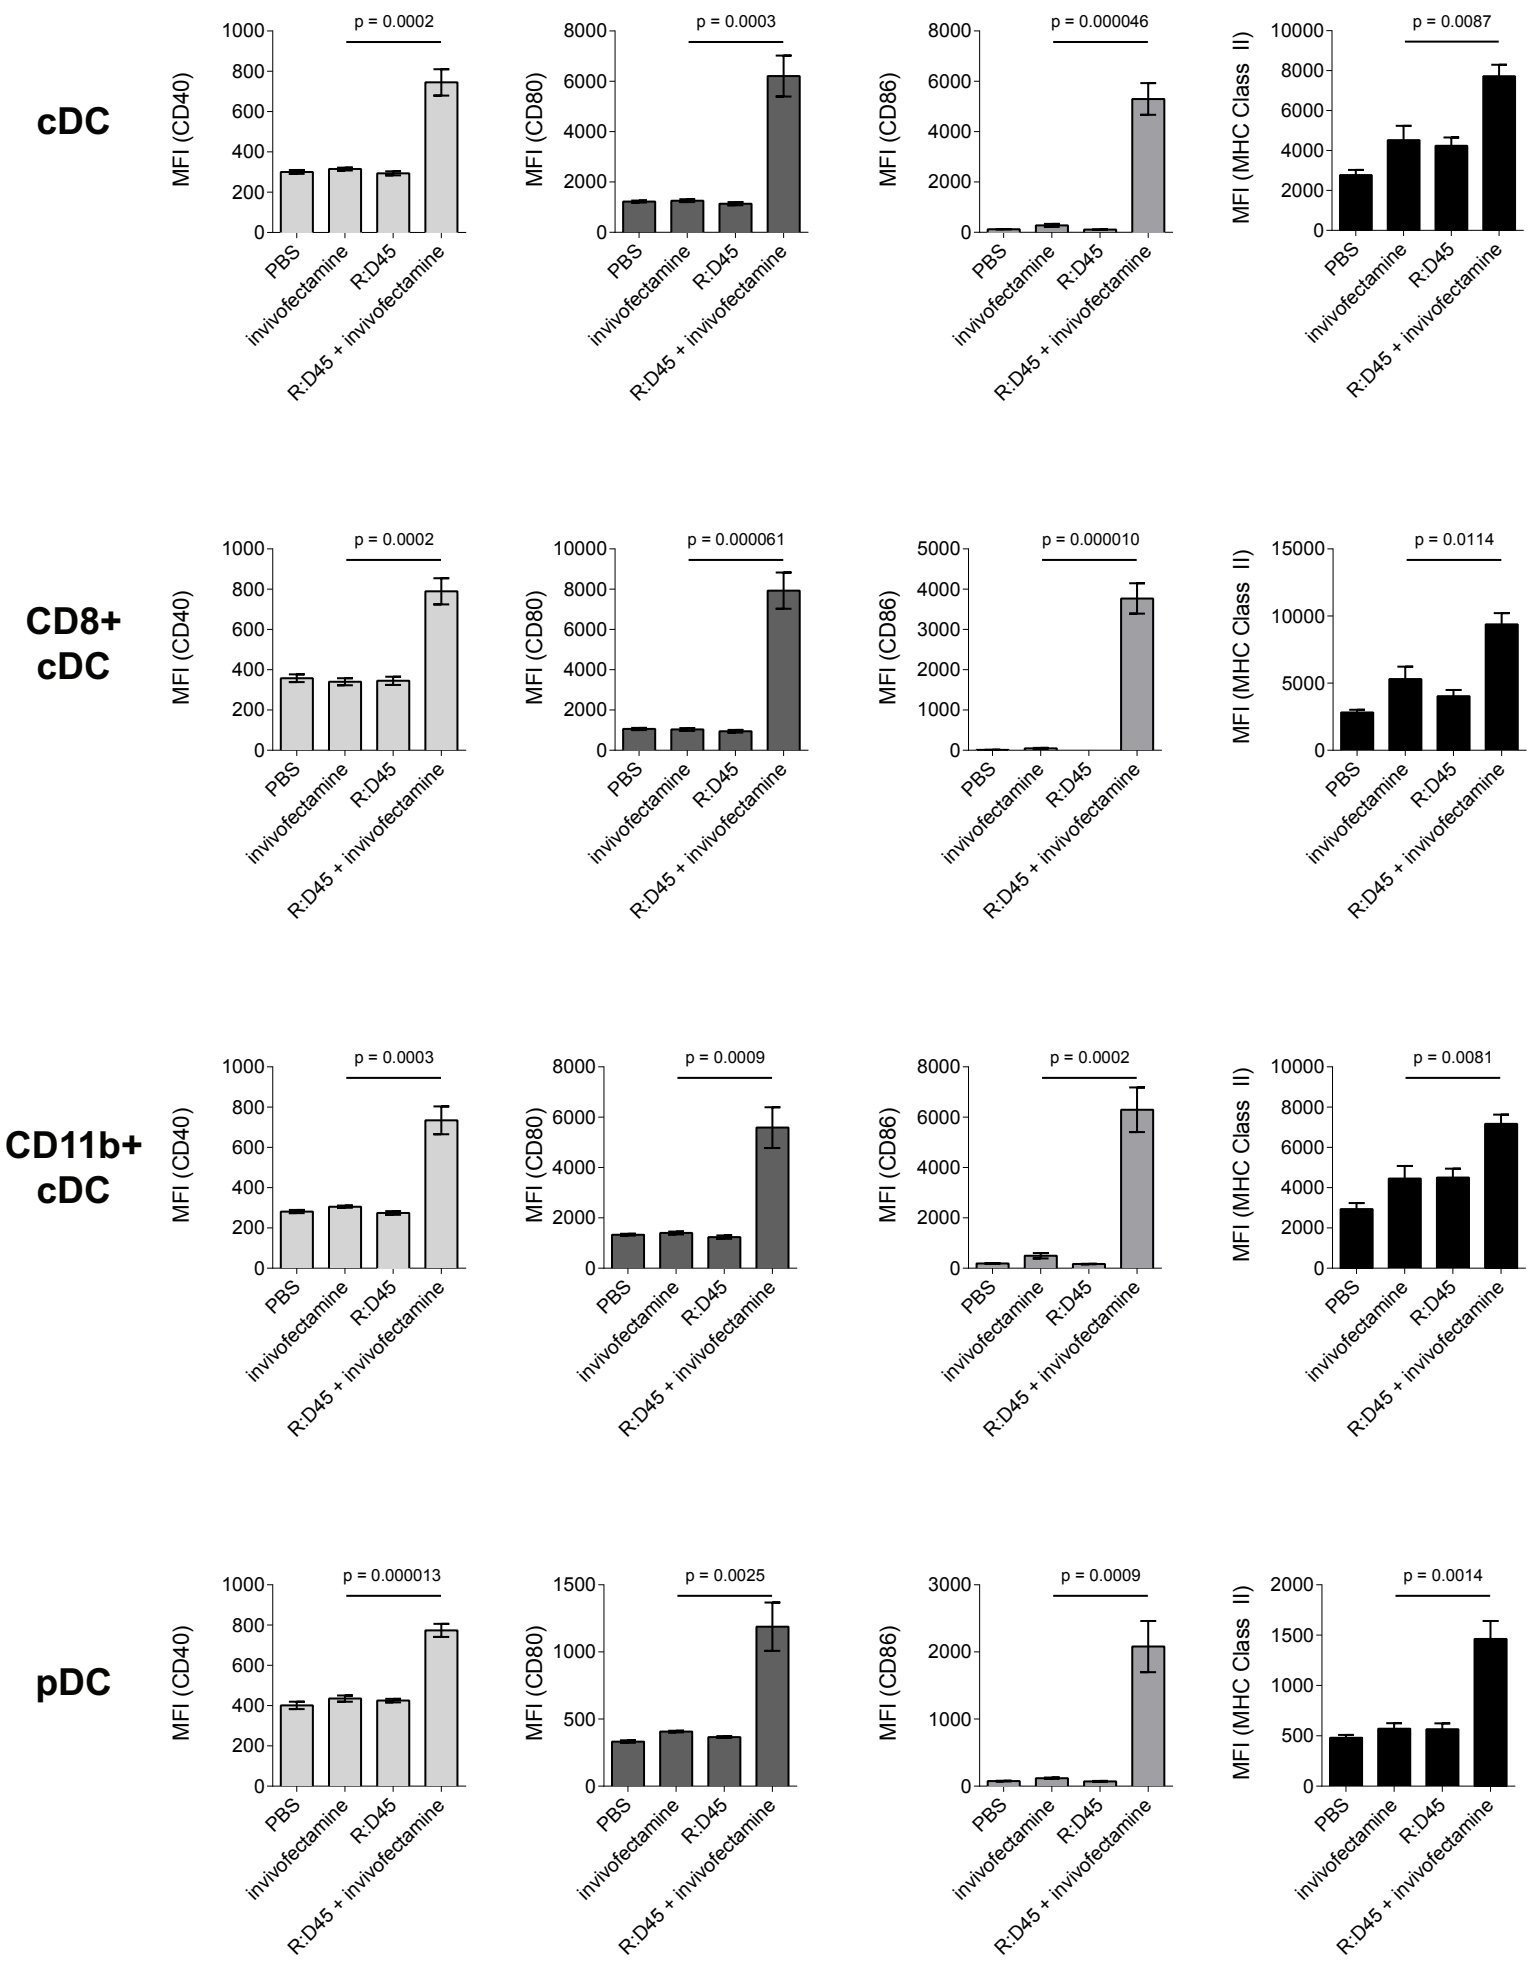

***Figure S3. In vivo delivery of R:D45 using Invivofectamine is required for activation of all DC subsets***

Delivery of R:D45 complexed to Invivofectamine *in vivo* phenotypically activates DCs. C57BL/6 mice were injected intraperitoneally with 80 µg R:D45 or 80 µg R:D45 complexed to Invivofectamine and the activation of splenic DC populations analysed 12 hours later by flow cytometry, as described in Figure 3. MFI values shown are from one experiment  $\pm$  s.e.m. (n=5 mice per group), representative of three independent experiments.
