# Supplementary material for: RNA:DNA hybrids are a novel molecular pattern sensed by TLR9
Source: PubMed Central journal article supplement (PMC3989650; doi:10.1002/embj.201386117), 2014-02-21
Supplement: embj0033-0542-sd5.pdf [file embj0033-0542-sd5.pdf]

# Figure S4

**A**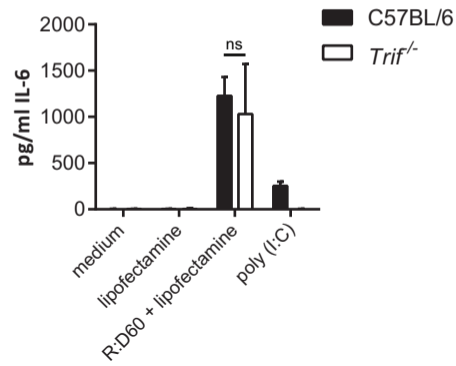**B**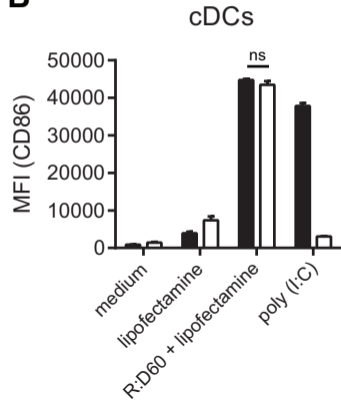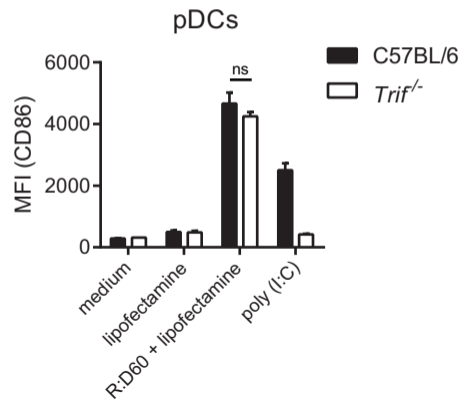

***Figure S4. Signalling via the adaptor molecule TRIF is not required for the cytokine response to RNA:DNA hybrids in FLDCs***

FLDCs derived from *Trif*<sup>-/-</sup> and C57BL/6 control mice were transfected with 1 µg/ml R:D60 complexed to Lipofectamine LTX or stimulated by the addition of 1 µg/ml poly (I:C) to the culture medium. Levels of supernatant IL-6 (**A**) and expression of CD40/CD80/CD86 (**B**) were quantified 18 h later. Data are representative of two independent experiments  $\pm$  s.e.m. of triplicate samples. ns, not significant (unpaired t test).
