# Supplementary material for: RNA:DNA hybrids are a novel molecular pattern sensed by TLR9
Source: PubMed Central journal article supplement (PMC3989650; doi:10.1002/embj.201386117), 2014-02-21
Supplement: embj0033-0542-sd6.pdf [file embj0033-0542-sd6.pdf]

Figure S5

**A**

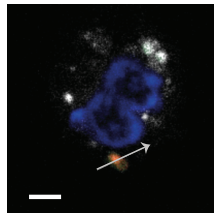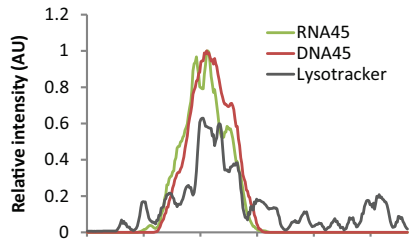

**B**

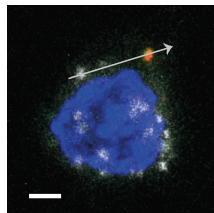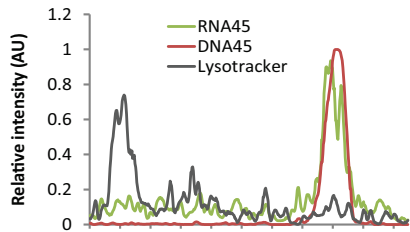

***Figure S5. Fluorescently labelled R:D45 colocalises with LysoTracker, a marker of the acidified endolysosomal compartment***

**(A)** A confocal microscope z-section of a FLDC transfected with R:D45 cell demonstrating colocalisation of fluorescently labelled hybrid with LysoTracker. Fluorescence intensity profiles of Cy3, Cy5 and LysoTracker plotted against distance, through region denoted by arrow. **(B)** Not all R:D45 foci colocalise with endolysosomes. Fluorescence intensity measurements through region denoted by arrow demonstrating an endolysosome without hybrid and a RD45 foci without endolysosomal co-staining.
